# Supplementary material for: Re-imagining fMRI for awake behaving infants
Source: PubMed Central journal article supplement (PMC7481790; doi:10.1038/s41467-020-18286-y), 2020-09-09
Supplement: 41467_2020_18286_MOESM3_ESM.pdf [file 41467_2020_18286_MOESM3_ESM.pdf]

## **Description of Additional Supplementary Files**

File Name: Supplementary Movie 1

Description: Video showing all time-points of three functional runs acquired from infants. The first is an example of a run with low motion, the second moderate motion, and the third severe motion. Coded names correspond to those used in the data release.
